# Supplementary material
Source: PubMed Central journal article supplement (PMC4789774)
Supplement: NIHMS736053-supplement-01.pdf [file NIHMS736053-supplement-01.pdf]

Supplemental Figure S1

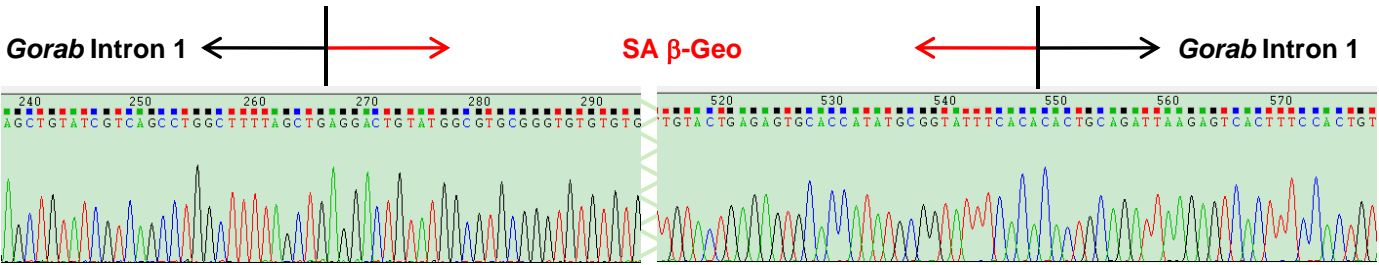

**Primers used for genotyping and sequencing**

Intron1-F: 5'-GATTGGACCCAGAGTGTTCATAATGGTTC-3'  
Intron1-R: 5'-GCCAGACACTCATTATCACAATTAAAAGC-3'  
Wild-type allele: 451 bp  
Trapped allele: Not detectable

Trap-F: 5'-GCAGTGCACGGCAGATACACTTG-3'  
Trap-R: 5'-CTGATCGACAAGACCGGCTTCC-3'  
Wild-type allele: Not detectable  
Trapped allele: 1,100 bp

**Supplemental Figure S1. Location of gene-trap vector insertion site by sequencing and primers used in genotyping and sequencing.**

## Supplemental Figure S2

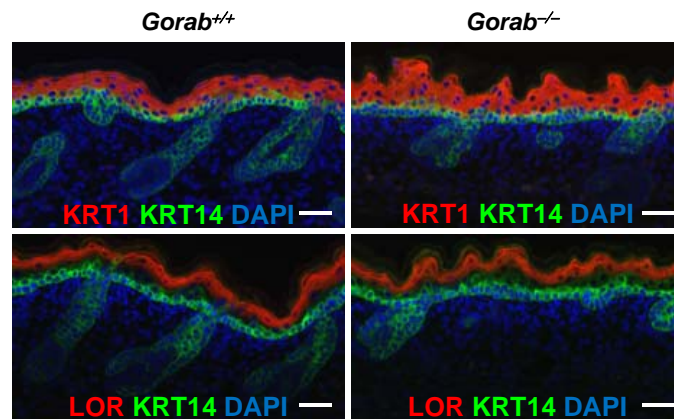

**Supplemental Figure S2. Examination of epidermal differentiation.** Immunofluorescence labeling of keratin 1 (KRT1, red in upper panels) and loricrin (LOR, red in lower panels) in E18.5 dorsal skin of control (*Gorab*<sup>+/+</sup>) and homozygous *Gorab* mutants (*Gorab*<sup>-/-</sup>). Keratin 14 (KRT14) was labeled green; Nuclei were stained with DAPI (blue). Scale bars: 50  $\mu$ m.

# Supplemental Figure S3

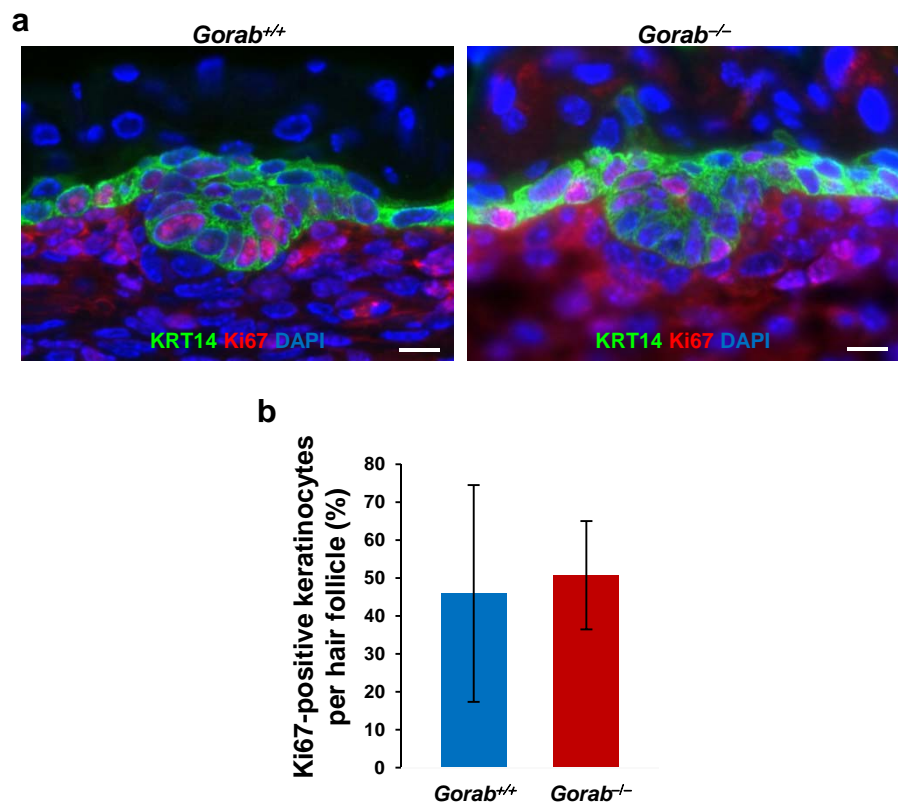

**Supplemental Figure S3. Examination of proliferating cells in hair germs. (a)** Representative images of Ki67-positive cells in stage 2 hair follicles in E15.5 control (*Gorab*<sup>+/+</sup>) and homozygous *Gorab* mutants (*Gorab*<sup>-/-</sup>). KRT14 was labeled in green; Ki67 was labeled in red; nuclei were stained with DAPI (blue). **(b)** Quantification of Ki67-positive follicular keratinocytes in stage 2 and stage 3 hair follicles in E15.5 dorsal skins. Scale bar: 5  $\mu$ m.

## Supplemental Figure S4

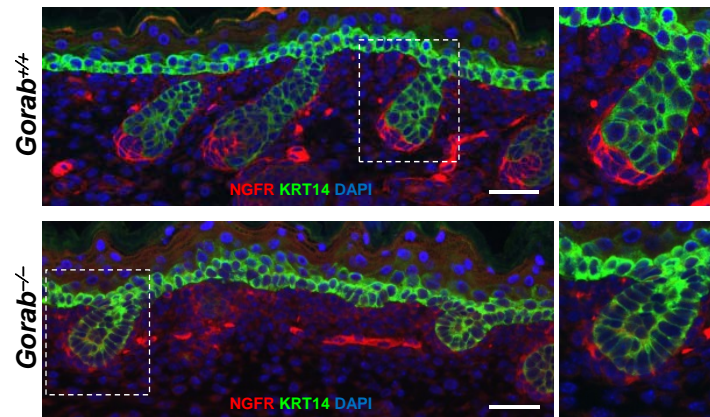**Supplemental Figure S4. Examination of dermal condensate cells in E18.5 hair germs.**

Immunofluorescence labeling of dermal condensate cells with NGFR (red) in the dorsal skin of control (*Gorab*<sup>+/+</sup>) and homozygous mutants (*Gorab*<sup>-/-</sup>). Panels on the right represent magnified boxed areas on left. KRT14 was labeled in green; nuclei were stained with DAPI (blue). Scale bar: 50  $\mu$ m.

# Supplemental Figure S5

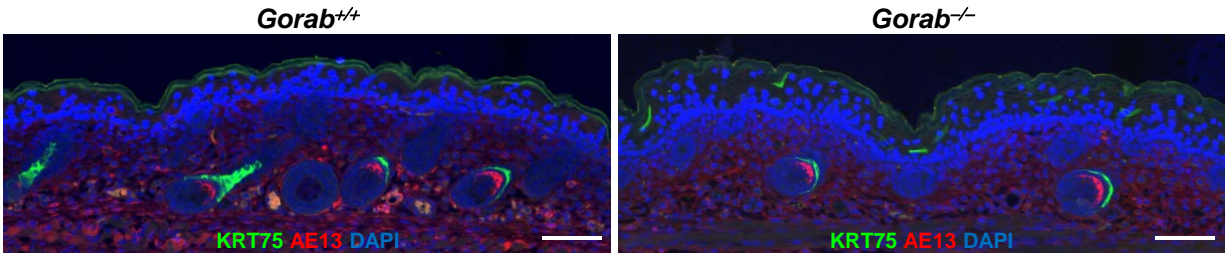

**Supplemental Figure S5. Hair follicle differentiation in *Gorab*<sup>+/+</sup> and *Gorab*<sup>-/-</sup> mice.** Immunofluorescence labeling of dorsal skin of E18.5 control (*Gorab*<sup>+/+</sup>) and homozygous mutant (*Gorab*<sup>-/-</sup>) with KRT75 (red) and AE13 (green). Nuclei were stained with DAPI (blue). Scale bars: 100  $\mu$ m.

## Supplemental Figure S6

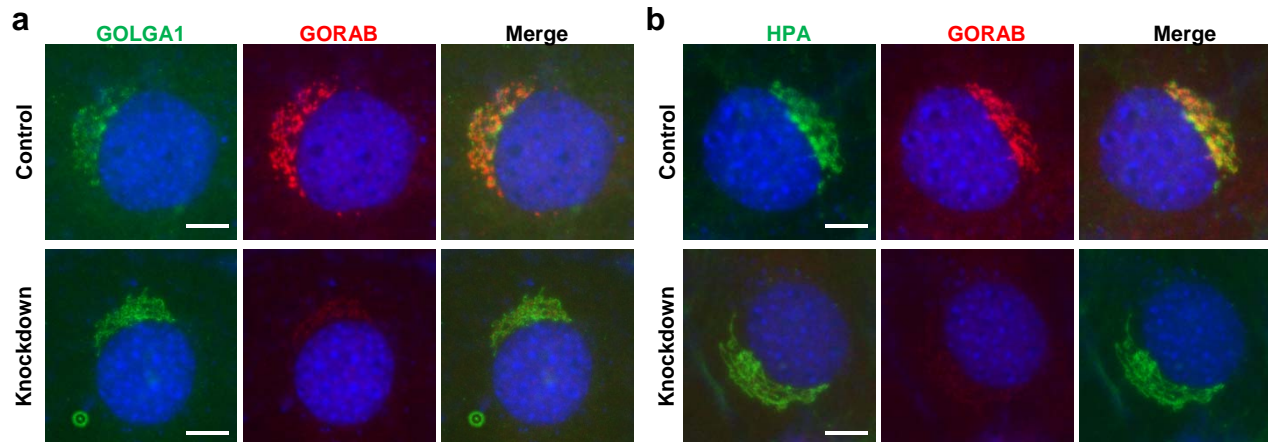**Supplemental Figure S6. Expression of Golgi proteins in *Gorab*-knockdown cells. (a)**

Immunofluorescence labeling of *trans*-Golgi marker Golgin-97 (GOLGA1, green) and GORAB (red) in control and *Gorab*-knockdown mouse embryonic fibroblasts (MEFs). **(b)** Immunofluorescence labeling of *cis*-medial Golgi marker lectin *Helix pomatia* agglutinin (HPA, green) and GORAB (red) in control and knockdown MEFs. Scale bars: 10  $\mu$ m.

# Supplemental Figure S7

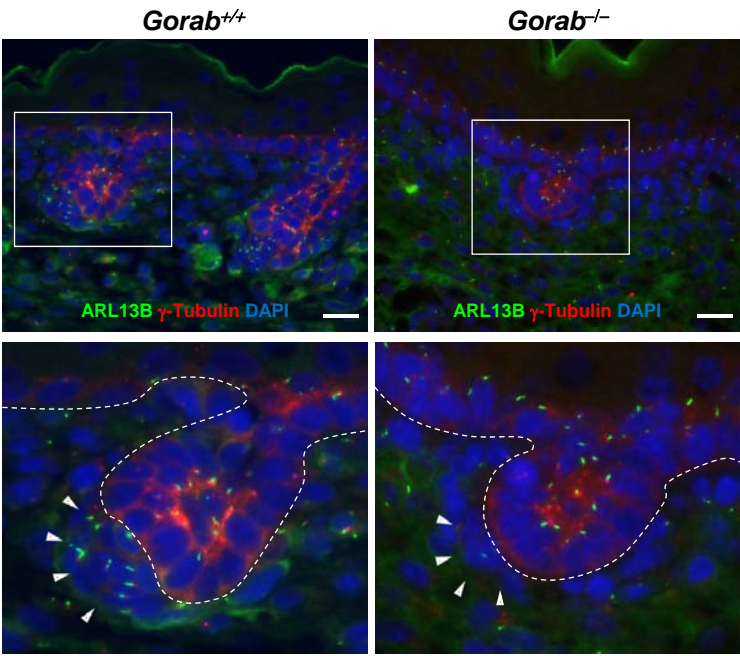

**Supplemental Figure S7. Primary cilia in dermal condensate cells.** Immunofluorescence labeling of primary cilia with ARL13B (green) in dorsal skin of E15.5 control (*Gorab*<sup>+/+</sup>) and homozygous *Gorab* mutants (*Gorab*<sup>-/-</sup>). Lower panels are magnified images of boxed hair germs above. Dotted lines represent basement membrane. Basal bodies were labeled with  $\gamma$  - tubulin (red); nuclei were stained with DAPI (blue). Dotted lines illustrate the basement membrane. Arrowheads point to dermal papilla cells. Scale bar: 20  $\mu$ m.
